# Supplementary material for: Metadata Analysis of Persistent Organic Pollutants in National Pools of Human Milk in Support of the Stockholm Convention Implementation
Source: PubMed Central journal article supplement — Environ Health (Wash). 2023 May 30;1(1):41–52. doi: 10.1021/envhealth.3c00020 (PMC11503848; doi:10.1021/envhealth.3c00020), 2023-05-30
Supplement: eh3c00020_si_001.pdf [file eh3c00020_si_001.pdf]

## Supporting information:

# Metadata analysis of persistent organic pollutants in national pools of human milk in support of the Stockholm Convention implementation

Heideloire Fiedler

<sup>a</sup> Örebro University, School of Science and Technology, MTM Research Centre, 702 18 Örebro, Sweden  
E-mail: Heideloire.fiedler@oru.se

## 1 Number of pools and assignment to metadata

Table S 1: Assignment of national pools by country for income (as GNI in USD *per* capita and year and WBC) and population density (as PopDen in inhabitants *per* km<sup>2</sup> and PD\_Code)

| Region, Country | Min of GNI     | Max of GNI     | Min of PopDen      | Max of PopDen      |
|-----------------|----------------|----------------|--------------------|--------------------|
| <b>Africa</b>   | <b>580</b>     | <b>25 460</b>  | <b>12</b>          | <b>623</b>         |
| MAR             | 7 700<br>2_LM  | 7 700<br>2_LM  | 82<br>PD_25-90     | 82<br>PD_25-90     |
| CIV             | 2 530<br>2_LM  | 4 550<br>2_LM  | 65<br>PD_25-90     | 73<br>PD_25-90     |
| COD             | 580<br>1_L     | 1 030<br>1_L   | 28<br>PD_25-90     | 36<br>PD_25-90     |
| DJI             | 3 650<br>2_LM  | 3 650<br>2_LM  | 37<br>PD_25-90     | 37<br>PD_25-90     |
| EGY             | 6 080<br>2_LM  | 11 820<br>2_LM | 70<br>PD_25-90     | 101<br>PD_90-200   |
| ETH             | 1 210<br>1_L   | 2 300<br>1_L   | 93<br>PD_90-200    | 99<br>PD_90-200    |
| GHA             | 2 780<br>1_L   | 5 540<br>2_LM  | 106<br>PD_90-200   | 134<br>PD_90-200   |
| KEN             | 2 140<br>1_L   | 4 570<br>2 140 | 72<br>PD_25-90     | 92<br>PD_90-200    |
| MLI             | 1 650<br>1_L   | 2 330<br>1_L   | 12<br>PD<25        | 16<br>PD<25        |
| MUS             | 14 990<br>3_UM | 25 460<br>3_UM | 614<br>PD_330-2000 | 623<br>PD_330-2000 |
| NER             | 1 140<br>1_L   | 1 200<br>1_L   | 14<br>PD<25        | 16<br>PD<25        |
| NGA             | 3 970<br>1_L   | 5 180<br>2_LM  | 165<br>PD_90-200   | 221<br>PD_200-330  |
| SDN             | 2 370<br>1_L   | 2 370<br>1_L   | 18<br>PD<25        | 18<br>PD<25        |
| SEN             | 2 580<br>1_L   | 3 300<br>2_LM  | 64<br>PD_25-90     | 82<br>PD_25-90     |
| TGO             | 1 140<br>1_L   | 2 010<br>1_L   | 118<br>PD_90-200   | 142<br>PD_90-200   |
| TUN             | 11 410<br>2_LM | 11 410<br>2_LM | 75<br>PD_25-90     | 75<br>PD_25-90     |
| TZA             | 2 810<br>2_LM  | 2 810<br>2_LM  | 65<br>PD_25-90     | 65<br>PD_25-90     |

## Supporting information

| Region, Country | Min of GNI     | Max of GNI     | Min of PopDen      | Max of PopDen      |
|-----------------|----------------|----------------|--------------------|--------------------|
| UGA             | 1 990<br>1_L   | 2 110<br>1_L   | 157<br>PD_90-200   | 213<br>PD_200-330  |
| ZMB             | 3 550<br>2_LM  | 3 550<br>2_LM  | 24<br>PD<25        | 24<br>PD<25        |
| <b>Asia</b>     | <b>860</b>     | <b>47 250</b>  | <b>2</b>           | <b>6 641</b>       |
| CHN             | 6 830<br>2_LM  | 10 200<br>3_UM | 140<br>PD_90-200   | 143<br>PD_90-200   |
| FJI             | 6 400<br>2_LM  | 13 090<br>2_LM | 45<br>PD_25-90     | 49<br>PD_25-90     |
| HKG             | 29 820<br>4_H  | 47 250<br>4_H  | 6 423<br>PD>2000   | 6 641<br>PD>2000   |
| IDN             | 8 840<br>2_LM  | 8 840<br>2_LM  | 135<br>PD_90-200   | 135<br>PD_90-200   |
| IND             | 3 890<br>2_LM  | 3 890<br>2_LM  | 410<br>PD_330-2000 | 410<br>PD_330-2000 |
| JPN             | 19 720<br>4_H  | 19 720<br>4_H  | 335<br>PD_330-2000 | 335<br>PD_330-2000 |
| KHM             | 4 310<br>2_LM  | 4 310<br>2_LM  | 93<br>PD_90-200    | 93<br>PD_90-200    |
| KIR             | 2 430<br>2_LM  | 4 290<br>2_LM  | 116<br>PD_90-200   | 143<br>PD_90-200   |
| KOR             | 29 950<br>4_H  | 29 950<br>4_H  | 506<br>PD_330-2000 | 506<br>PD_330-2000 |
| MHL             | 3 950<br>2_LM  | 5 190<br>3_UM  | 314<br>PD_200-330  | 327<br>PD_200-330  |
| MNG             | 11 160<br>2_LM | 11 160<br>2_LM | 2.0<br>PD<25       | 2.0<br>PD<25       |
| NIU             | 5 800<br>2_LM  | 16 550<br>3_UM | 6.2<br>PD<25       | 6.2<br>PD<25       |
| PAK             | 2 130<br>1_L   | 2 130<br>1_L   | 148<br>PD_90-200   | 148<br>PD_90-200   |
| PHL             | 4 010<br>2_LM  | 4 010<br>2_LM  | 273<br>PD_200-330  | 273<br>PD_200-330  |
| PLW             | 16 200<br>3_UM | 19 430<br>4_H  | 39<br>PD_25-90     | 39<br>PD_25-90     |
| SLB             | 2 160<br>2_LM  | 2 740<br>2_LM  | 19<br>PD<25        | 24<br>PD<25        |
| SYR             | 2 900<br>2_LM  | 2 900<br>2_LM  | 115<br>PD_90-200   | 115<br>PD_90-200   |
| THA             | 4 250<br>2_LM  | 17 630<br>3_UM | 106<br>PD_90-200   | 136<br>PD_90-200   |
| TJK             | 2 640<br>1_L   | 2 640<br>1_L   | 53<br>PD_25-90     | 53<br>PD_25-90     |
| TON             | 4 840<br>2_LM  | 4 840<br>2_LM  | 144<br>PD_90-200   | 144<br>PD_90-200   |
| TUV             | 4 750<br>2_LM  | 4 750<br>2_LM  | 354<br>PD_330-2000 | 354<br>PD_330-2000 |
| VNM             | 860<br>1_L     | 7 840<br>2_LM  | 196<br>PD_90-200   | 311<br>PD_200-330  |
| VUT             | 3 260<br>2_LM  | 3 260<br>2_LM  | 24<br>PD<25        | 24<br>PD<25        |
| WSM             | 5 440<br>3_UM  | 6 620<br>3_UM  | 66<br>PD_25-90     | 70<br>PD_25-90     |
| <b>CEE</b>      | <b>1 740</b>   | <b>40 700</b>  | <b>9</b>           | <b>138</b>         |
| ALB             | 1 740<br>2_LM  | 1 740<br>2_LM  | 119<br>PD_90-200   | 119<br>PD_90-200   |
| BGR             | 6 970          | 17 470         | 67                 | 72                 |

## Supporting information

| Region, Country | Min of GNI       | Max of GNI       | Min of PopDen      | Max of PopDen      |
|-----------------|------------------|------------------|--------------------|--------------------|
|                 | 2_LM             | 3_UM             | PD_25-90           | PD_25-90           |
| CZE             | 11 820<br>2_LM   | 40 700<br>4_H    | 132<br>PD_90-200   | 138<br>PD_90-200   |
| GEO             | 6 960<br>2_LM    | 11 420<br>2_LM   | 65<br>PD_25-90     | 67<br>PD_25-90     |
| HRV             | 5 640<br>2_LM    | 21 860<br>4_H    | 76<br>PD_25-90     | 85<br>PD_25-90     |
| HUN             | 7 390<br>3_UM    | 17 230<br>3_UM   | 112<br>PD_90-200   | 118<br>PD_90-200   |
| LTU             | 4 710<br>2_LM    | 27 790<br>4_H    | 46<br>PD_25-90     | 59<br>PD_25-90     |
| MDA             | 6 230<br>2_LM    | 9 790<br>2_LM    | 124<br>PD_90-200   | 124<br>PD_90-200   |
| ROU             | 6 490<br>2_LM    | 20 560<br>3_UM   | 87<br>PD_25-90     | 96<br>PD_90-200    |
| RUS             | 6 800<br>2_LM    | 7 260<br>2_LM    | 8.9<br>PD<25       | 9.1<br>PD<25       |
| SVK             | 7 520<br>2_LM    | 32 040<br>4_H    | 110<br>PD_90-200   | 113<br>PD_90-200   |
| UKR             | 4 550<br>1_L     | 6 350<br>2_LM    | 84<br>PD_25-90     | 90<br>PD_90-200    |
| <b>GRULAC</b>   | <b>2 280</b>     | <b>24 550</b>    | <b>3</b>           | <b>667</b>         |
| ARG             | 22 090<br>22 090 | 22 090<br>22 090 | 16<br>PD<25        | 16<br>PD<25        |
| ATG             | 20 480<br>4_H    | 24 550<br>4_H    | 194<br>PD_90-200   | 219<br>PD_200-330  |
| BRA             | 8 960<br>3_UM    | 14 670<br>3_UM   | 21<br>PD<25        | 24<br>PD<25        |
| BRB             | 15 320<br>4_H    | 15 730<br>4_H    | 656<br>PD_330-2000 | 667<br>PD_330-2000 |
| CHL             | 15 220<br>3_UM   | 19 110<br>3_UM   | 22<br>PD<25        | 23<br>PD<25        |
| COL             | 15 260<br>3_UM   | 15 260<br>3_UM   | 45<br>PD_25-90     | 45<br>PD_25-90     |
| CUB             | 21 200<br>3_UM   | 21 200<br>3_UM   | 105<br>PD_90-200   | 105<br>PD_90-200   |
| ECU             | 11 500<br>3_UM   | 11 500<br>3_UM   | 70<br>PD_25-90     | 70<br>PD_25-90     |
| HTI             | 2 280<br>1_L     | 2 910<br>1_L     | 328<br>PD_200-330  | 388<br>PD_330-2000 |
| JAM             | 7 870<br>3_UM    | 9 590<br>3_UM    | 261<br>PD_200-330  | 271<br>PD_200-330  |
| MEX             | 16 260<br>3_UM   | 19 210<br>3_UM   | 60<br>PD_25-90     | 64<br>PD_25-90     |
| PER             | 9 700<br>3_UM    | 12 820<br>3_UM   | 23<br>PD<25        | 25<br>PD<25        |
| SUR             | 15 170<br>3_UM   | 15 170<br>3_UM   | 3.5<br>PD<25       | 3.5<br>PD<25       |
| URY             | 14 960<br>3_UM   | 22 850<br>4_H    | 19<br>PD<25        | 20<br>PD<25        |
| <b>WEOG</b>     | <b>14 650</b>    | <b>69 500</b>    | <b>3</b>           | <b>501</b>         |
| AUS             | 27 990<br>4_H    | 44 760<br>4_H    | 2.6<br>PD<25       | 3.0<br>PD<25       |
| AUT             | 19 510<br>4_H    | 52 680<br>4_H    | 92<br>PD_90-200    | 106<br>PD_90-200   |
| BEL             | 18 700<br>4_H    | 46 850<br>4_H    | 290<br>PD_200-330  | 372<br>PD_330-2000 |

Supporting information

| Region, Country | Min of GNI    | Max of GNI    | Min of PopDen      | Max of PopDen      |
|-----------------|---------------|---------------|--------------------|--------------------|
| CAN             | 19 000<br>4_H | 20 000<br>4_H | 2.9<br>PD<25       | 3.1<br>PD<25       |
| CHE             | 54 270<br>4_H | 67 820<br>4_H | 196<br>PD_90-200   | 212<br>PD_200-330  |
| CYP             | 28 310<br>4_H | 28 310<br>4_H | 113<br>PD_90-200   | 113<br>PD_90-200   |
| DEU             | 19 630<br>4_H | 58 110<br>4_H | 223<br>PD_200-330  | 238<br>PD_200-330  |
| DNK             | 17 580<br>4_H | 19 160<br>4_H | 121<br>PD_90-200   | 122<br>PD_90-200   |
| ESP             | 14 650<br>4_H | 24 100<br>4_H | 78<br>PD_25-90     | 83<br>PD_25-90     |
| FIN             | 16 530<br>4_H | 37 900<br>4_H | 16<br>PD<25        | 17<br>PD<25        |
| GBR             | 17 350<br>4_H | 18 370<br>4_H | 235<br>PD_200-330  | 238<br>PD_200-330  |
| IRL             | 27 830<br>4_H | 69 500<br>4_H | 56<br>PD_25-90     | 72<br>PD_25-90     |
| ISR             | 31 030<br>4_H | 31 030<br>4_H | 366<br>PD_330-2000 | 366<br>PD_330-2000 |
| ITA             | 27 960<br>4_H | 27 960<br>4_H | 194<br>PD_90-200   | 194<br>PD_90-200   |
| LUX             | 49 410<br>4_H | 63 080<br>4_H | 184<br>PD_90-200   | 195<br>PD_90-200   |
| NLD             | 19 000<br>4_H | 49 110<br>4_H | 434<br>PD_330-2000 | 501<br>PD_330-2000 |
| NOR             | 17 900<br>4_H | 54 130<br>4_H | 11<br>PD<25        | 13<br>PD<25        |
| NZL             | 20 290<br>4_H | 31 220<br>4_H | 15<br>PD<25        | 17<br>PD<25        |
| SWE             | 19 880<br>4_H | 56 950<br>4_H | 20<br>PD<25        | 25.2<br>PD_25-90   |
| USA             | 23 640<br>4_H | 39 760<br>4_H | 26<br>PD_25-90     | 32<br>PD_25-90     |
| Grand Total     | 580           | 69 500        | 2.0                | 6 641              |

Table S 2: Number of national pools in each period grouped according to income (WBC) and population density (PD\_Code)

|              | 1985-1989<br>(N=16) | 1990-1994<br>(N=19) | 2000-2004<br>(N=27) | 2005-2009<br>(N=35) | 2010-2014<br>(N=41) | 2015-2019<br>(N=51) | Overall<br>(N=189) |
|--------------|---------------------|---------------------|---------------------|---------------------|---------------------|---------------------|--------------------|
| WBC          |                     |                     |                     |                     |                     |                     |                    |
| 1_L          | 1                   | 1                   | 2                   | 9                   | 4                   | 7                   | 24 (12.7%)         |
| 2_LM         | 2                   | 7                   | 6                   | 9                   | 13                  | 17                  | 54 (28.6%)         |
| 3_UM         | 1                   | 1                   | 5                   | 7                   | 14                  | 13                  | 41 (21.7%)         |
| 4_H          | 12                  | 10                  | 14                  | 10                  | 10                  | 14                  | 70 (37.0%)         |
| PD_Code      |                     |                     |                     |                     |                     |                     |                    |
| PD1<25       | 4                   | 4                   | 7                   | 7                   | 13                  | 11                  | 46 (24.3%)         |
| PD2_25-90    | 2                   | 3                   | 8                   | 7                   | 12                  | 15                  | 47 (24.9%)         |
| PD3_90-200   | 5                   | 8                   | 6                   | 16                  | 8                   | 12                  | 55 (29.1%)         |
| PD4_200-330  | 3                   | 3                   | 3                   | 0                   | 2                   | 9                   | 20 (10.6%)         |
| PD5_330-2000 | 2                   | 1                   | 2                   | 4                   | 6                   | 4                   | 19 (10.1%)         |
| PD6>2000     | 0                   | 0                   | 1                   | 1                   | 0                   | 0                   | 2 (1.1%)           |

# Supporting information

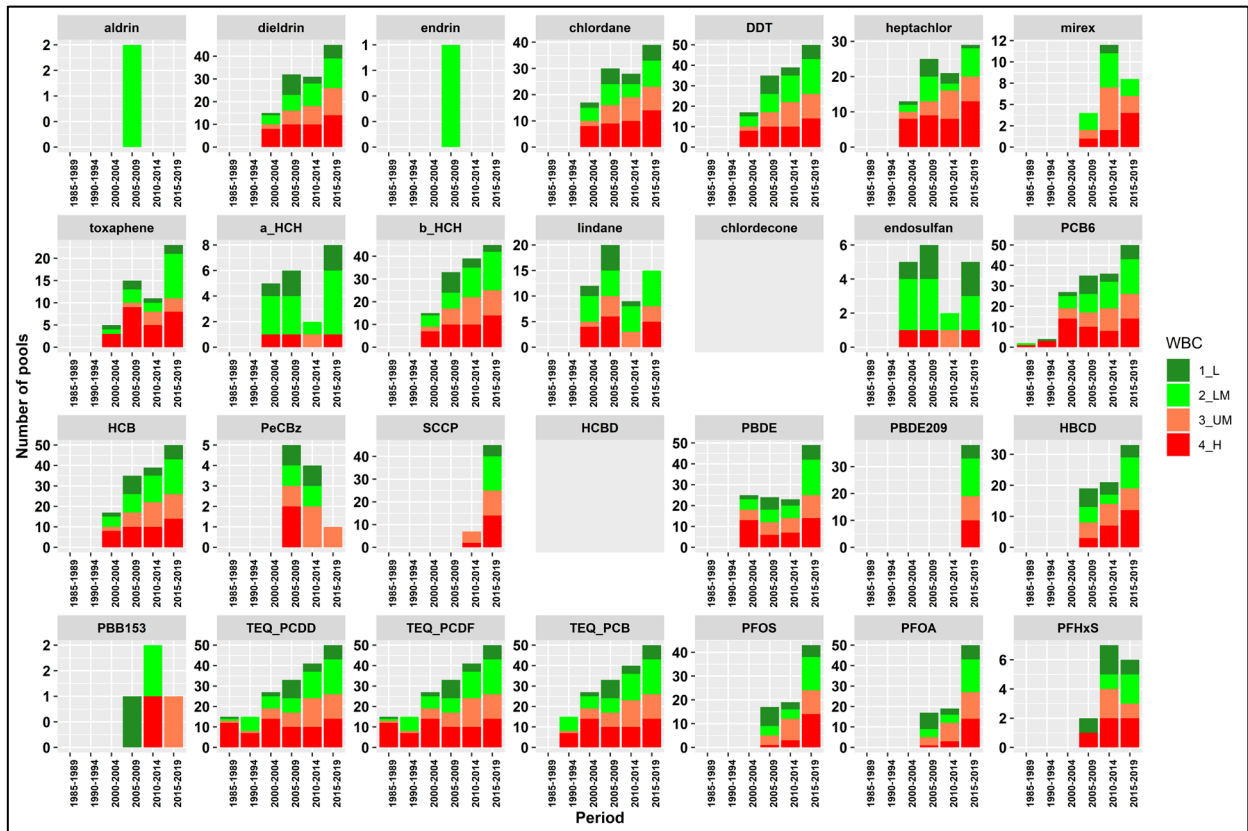

Figure S 1: Detection frequency of POPs in national pools from each period and by POP and colored by WBC

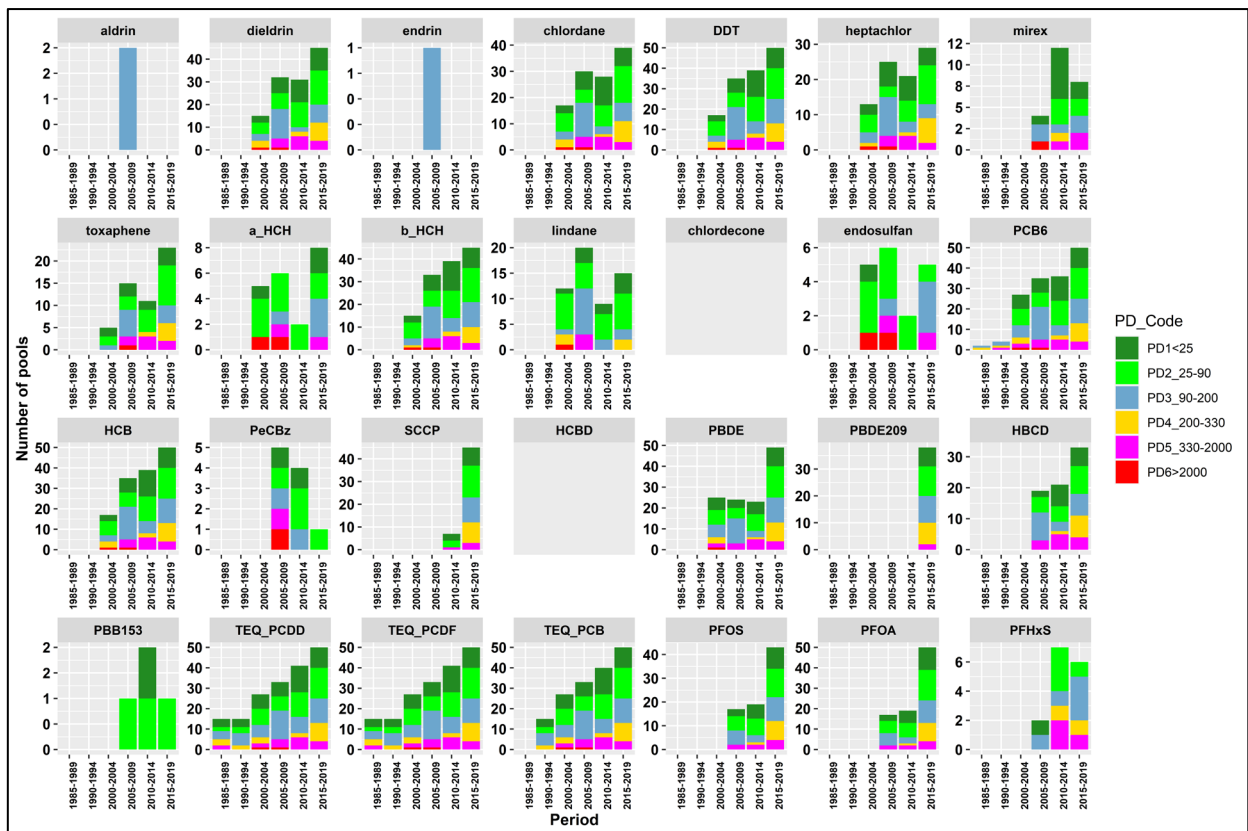

Figure S 2: Detection frequency of POPs in national pools from each period and by POP and colored by PD\_Code

## 2 Summary of quantitative results

Table S 3: Descriptive statistics for measured POPs grouped according to the WBC. Amounts in ng/g lipid for most POPs, pg TEQ/g lipid for dl-POPs, and pg/g f.w. for PFAS

|               | L (N=24)       | LM (N=54)     | UM (N=41)      | H (N=70)       | Overall (N=189) |
|---------------|----------------|---------------|----------------|----------------|-----------------|
| aldrin        |                |               |                |                |                 |
| Mean (SD)     | 0              | 0.203 (0.974) | 0              | 0              | 0.0632 (0.548)  |
| Median        | 0              | 0             | 0              | 0              | 0               |
| [Min, Max]    | [0, 0]         | [0, 5.67]     | [0, 0]         | [0, 0]         | [0, 5.67]       |
| dieldrin      |                |               |                |                |                 |
| Mean (SD)     | 3.79 (7.99)    | 1.44 (1.41)   | 1.92 (2.13)    | 3.67 (3.14)    | 2.58 (3.90)     |
| Median        | 1.42           | 1.13          | 1.72           | 2.59           | 1.74            |
| [Min, Max]    | [0, 37.8]      | [0, 6.56]     | [0, 11.7]      | [0.530, 16.8]  | [0, 37.8]       |
| endrin        |                |               |                |                |                 |
| Mean (SD)     | 0              | 0.341 (2.26)  | 0              | 0              | 0.106 (1.26)    |
| Median        | 0              | 0             | 0              | 0              | 0               |
| [Min, Max]    | [0, 0]         | [0, 15.0]     | [0, 0]         | [0, 0]         | [0, 15.0]       |
| chlordane     |                |               |                |                |                 |
| Mean (SD)     | 2.93 (3.64)    | 1.74 (2.98)   | 1.82 (2.16)    | 4.01 (3.08)    | 2.62 (3.09)     |
| Median        | 1.38           | 0.890         | 1.56           | 3.32           | 1.60            |
| [Min, Max]    | [0, 13.2]      | [0, 17.5]     | [0, 10.0]      | [0, 13.5]      | [0, 17.5]       |
| DDT           |                |               |                |                |                 |
| Mean (SD)     | 2340 (4860)    | 638 (819)     | 426 (441)      | 218 (323)      | 729 (2080)      |
| Median        | 751            | 390           | 313            | 141            | 260             |
| [Min, Max]    | [97.7, 22300]  | [17.4, 4320]  | [30.5, 1740]   | [29.9, 1970]   | [17.4, 22300]   |
| heptachlor    |                |               |                |                |                 |
| Mean (SD)     | 0.710 (1.06)   | 0.706 (2.03)  | 1.08 (2.60)    | 1.95 (1.78)    | 1.16 (2.05)     |
| Median        | 0              | 0             | 0.565          | 1.44           | 0.565           |
| [Min, Max]    | [0, 3.63]      | [0, 12.5]     | [0, 14.7]      | [0, 8.75]      | [0, 14.7]       |
| mirex         |                |               |                |                |                 |
| Mean (SD)     | 0.0347 (0.155) | 0.290 (0.766) | 0.845 (2.02)   | 0.214 (0.576)  | 0.368 (1.17)    |
| Median        | 0              | 0             | 0              | 0              | 0               |
| [Min, Max]    | [0, 0.693]     | [0, 3.40]     | [0, 9.80]      | [0, 2.94]      | [0, 9.80]       |
| toxaphene     |                |               |                |                |                 |
| Mean (SD)     | 1.10 (3.49)    | 1.01 (1.75)   | 0.571 (1.68)   | 1.66 (2.89)    | 1.12 (2.46)     |
| Median        | 0              | 0             | 0              | 0.903          | 0               |
| [Min, Max]    | [0, 16.2]      | [0, 8.06]     | [0, 7.96]      | [0, 15.9]      | [0, 16.2]       |
| $\alpha$ -HCH |                |               |                |                |                 |
| Mean (SD)     | 0.535 (1.44)   | 0.829 (2.14)  | 0.0375 (0.215) | 0.0650 (0.235) | 0.366 (1.36)    |
| Median        | 0              | 0             | 0              | 0              | 0               |
| [Min, Max]    | [0, 5.50]      | [0, 10.5]     | [0, 1.24]      | [0, 1.00]      | [0, 10.5]       |
| $\beta$ -HCH  |                |               |                |                |                 |
| Mean (SD)     | 30.7 (73.7)    | 50.6 (148)    | 20.2 (64.4)    | 52.2 (211)     | 40.6 (147)      |
| Median        | 2.65           | 4.14          | 5.27           | 8.90           | 5.47            |
| [Min, Max]    | [0, 279]       | [0.569, 845]  | [0, 375]       | [1.29, 1340]   | [0, 1340]       |
| lindane       |                |               |                |                |                 |
| Mean (SD)     | 1.85 (4.23)    | 1.23 (1.85)   | 0.582 (1.01)   | 1.04 (2.56)    | 1.12 (2.47)     |
| Median        | 0              | 0.551         | 0              | 0              | 0               |
| [Min, Max]    | [0, 16.0]      | [0, 8.00]     | [0, 3.50]      | [0, 13.0]      | [0, 16.0]       |
| chlordecone   |                |               |                |                |                 |
| Mean (SD)     | 0              | 0             | 0              | 0              | 0               |
| Median        | 0              | 0             | 0              | 0              | 0               |
| [Min, Max]    | [0, 0]         | [0, 0]        | [0, 0]         | [0, 0]         | [0, 0]          |
| endosulfan    |                |               |                |                |                 |
| Mean (SD)     | 0.535 (1.44)   | 0.554 (1.74)  | 0.0375 (0.215) | 0.0634 (0.233) | 0.280 (1.14)    |
| Median        | 0              | 0             | 0              | 0              | 0               |

## Supporting information

|                  | L (N=24)        | LM (N=54)      | UM (N=41)      | H (N=70)       | Overall (N=189) |
|------------------|-----------------|----------------|----------------|----------------|-----------------|
| [Min, Max]       | [0, 5.50]       | [0, 10.5]      | [0, 1.24]      | [0, 1.00]      | [0, 10.5]       |
| PCB <sub>6</sub> |                 |                |                |                |                 |
| Mean (SD)        | 27.0 (27.7)     | 26.9 (35.0)    | 67.4 (141)     | 99.9 (127)     | 59.8 (106)      |
| Median           | 21.1            | 14.1           | 16.4           | 48.4           | 23.4            |
| [Min, Max]       | [0.897, 127]    | [2.47, 177]    | [3.00, 630]    | [8.61, 765]    | [0.897, 765]    |
| HCB              |                 |                |                |                |                 |
| Mean (SD)        | 5.68 (15.1)     | 12.1 (24.6)    | 10.8 (16.3)    | 14.1 (12.8)    | 11.4 (18.3)     |
| Median           | 2.45            | 3.66           | 4.33           | 10.4           | 5.33            |
| [Min, Max]       | [0.970, 73.3]   | [1.26, 154]    | [1.14, 76.0]   | [2.70, 73.1]   | [0.970, 154]    |
| PeCBz            |                 |                |                |                |                 |
| Mean (SD)        | 0.0678 (0.199)  | 0.0436 (0.174) | 0.124 (0.315)  | 0.0502 (0.181) | 0.0709 (0.224)  |
| Median           | 0               | 0              | 0              | 0              | 0               |
| [Min, Max]       | [0, 0.680]      | [0, 0.853]     | [0, 1.16]      | [0, 0.700]     | [0, 1.16]       |
| HCBd             |                 |                |                |                |                 |
| Mean (SD)        | 0               | 0              | 0              | 0              | 0               |
| Median           | 0               | 0              | 0              | 0              | 0               |
| [Min, Max]       | [0, 0]          | [0, 0]         | [0, 0]         | [0, 0]         | [0, 0]          |
| SCCP             |                 |                |                |                |                 |
| Mean (SD)        | 55.1 (13.7)     | 86.4 (47.6)    | 57.8 (44.3)    | 36.5 (24.0)    | 59.2 (42.0)     |
| Median           | 50.2            | 77.0           | 42.3           | 32.1           | 48.3            |
| [Min, Max]       | [39.8, 70.0]    | [12.9, 188]    | [17.1, 175]    | [10.0, 101]    | [10.0, 188]     |
| PBDE             |                 |                |                |                |                 |
| Mean (SD)        | 0.572 (1.40)    | 0.357 (0.675)  | 0.669 (2.03)   | 1.07 (3.87)    | 0.694 (2.50)    |
| Median           | 0.123           | 0.147          | 0.111          | 0.287          | 0.163           |
| [Min, Max]       | [0, 6.10]       | [0, 3.20]      | [0.0392, 11.0] | [0.0324, 24.7] | [0, 24.7]       |
| PBDE209          |                 |                |                |                |                 |
| Mean (SD)        | 0.171 (0.0790)  | 0.398 (0.501)  | 1.16 (1.94)    | 0.604 (0.730)  | 0.617 (1.11)    |
| Median           | 0.156           | 0.195          | 0.234          | 0.269          | 0.205           |
| [Min, Max]       | [0.0896, 0.303] | [0.132, 1.62]  | [0, 5.92]      | [0.0939, 2.40] | [0, 5.92]       |
| PBB153           |                 |                |                |                |                 |
| Mean (SD)        | 0.0528 (0.224)  | 0.0566 (0.305) | 0.0621 (0.323) | 0.0556 (0.289) | 0.0571 (0.288)  |
| Median           | 0               | 0              | 0              | 0              | 0               |
| [Min, Max]       | [0, 0.950]      | [0, 1.64]      | [0, 1.68]      | [0, 1.50]      | [0, 1.68]       |
| HBCD             |                 |                |                |                |                 |
| Mean (SD)        | 0.388 (0.376)   | 0.810 (1.65)   | 1.64 (3.06)    | 1.16 (1.29)    | 1.05 (1.97)     |
| Median           | 0.325           | 0.300          | 0.570          | 0.635          | 0.500           |
| [Min, Max]       | [0, 1.34]       | [0, 8.00]      | [0, 15.0]      | [0, 5.60]      | [0, 15.0]       |
| TEQ_PCDD         |                 |                |                |                |                 |
| Mean (SD)        | 3.33 (4.06)     | 3.51 (3.03)    | 2.74 (1.60)    | 6.99 (6.64)    | 4.60 (4.97)     |
| Median           | 1.78            | 2.54           | 2.43           | 4.27           | 2.75            |
| [Min, Max]       | [0.565, 17.4]   | [0.936, 17.4]  | [0.955, 8.56]  | [1.22, 33.2]   | [0.565, 33.2]   |
| TEQ_PCDF         |                 |                |                |                |                 |
| Mean (SD)        | 1.12 (0.922)    | 1.94 (1.94)    | 1.47 (0.932)   | 3.16 (2.67)    | 2.18 (2.14)     |
| Median           | 0.919           | 1.12           | 1.09           | 2.05           | 1.38            |
| [Min, Max]       | [0.367, 4.13]   | [0.386, 9.48]  | [0.333, 3.75]  | [0.578, 13.5]  | [0.333, 13.5]   |
| TEQ_PCB          |                 |                |                |                |                 |
| Mean (SD)        | 2.00 (2.18)     | 3.11 (3.04)    | 2.22 (2.00)    | 3.78 (2.84)    | 2.98 (2.72)     |
| Median           | 1.43            | 1.89           | 1.56           | 2.71           | 2.00            |
| [Min, Max]       | [0.271, 10.6]   | [0.460, 16.2]  | [0, 8.70]      | [0.552, 12.9]  | [0, 16.2]       |
| PFOS             |                 |                |                |                |                 |
| Mean (SD)        | 16.9 (10.1)     | 29.1 (42.3)    | 25.0 (20.4)    | 24.6 (12.5)    | 24.4 (26.0)     |
| Median           | 17.1            | 16.4           | 22.3           | 19.7           | 18.9            |
| [Min, Max]       | [0, 38.1]       | [0, 212]       | [0, 83.3]      | [9.49, 51.4]   | [0, 212]        |
| PFOA             |                 |                |                |                |                 |
| Mean (SD)        | 19.1 (12.1)     | 18.2 (9.40)    | 22.6 (11.4)    | 29.6 (11.6)    | 22.1 (11.7)     |
| Median           | 17.0            | 15.2           | 22.4           | 31.0           | 18.6            |
| [Min, Max]       | [6.20, 63.4]    | [8.62, 48.8]   | [7.81, 61.5]   | [13.1, 57.8]   | [6.20, 63.4]    |

Supporting information

|                      | L (N=24)       | LM (N=54)     | UM (N=41)      | H (N=70)       | Overall (N=189) |
|----------------------|----------------|---------------|----------------|----------------|-----------------|
| PFHxS                |                |               |                |                |                 |
| Mean (SD)            | 3.10 (8.35)    | 5.27 (22.7)   | 1.00 (3.02)    | 2.59 (4.86)    | 2.96 (12.8)     |
| Median<br>[Min, Max] | 0<br>[0, 34.8] | 0<br>[0, 111] | 0<br>[0, 12.9] | 0<br>[0, 17.4] | 0<br>[0, 111]   |

Table S 4: Descriptive statistics for measured POPs grouped according to population density. Amounts in ng/g lipid for most POPs, pg TEQ/g lipid for dl-POPs, and pg/g f.w. for PFAS. Empty cells indicate that there was no sample for analysis for the respective parameter. NA = not applicable, e.g., there was only one value and therefore, no SD. "0" indicates measurement(s) below the LOQ

|                      | PD1<25<br>(N=46)    | PD2_25-90<br>(N=47) | PD3_90-200<br>(N=55) | PD4_200-330<br>(N=20) | PD5_330-2000<br>(N=19) | PD6>2000<br>(N=2)    | Overall<br>(N=189)   |
|----------------------|---------------------|---------------------|----------------------|-----------------------|------------------------|----------------------|----------------------|
| aldrin               |                     |                     |                      |                       |                        |                      |                      |
| Mean (SD)            | 0                   | 0                   | 0.24 (1.06)          | 0                     | 0                      | 0                    | 0.06 (0.55)          |
| Median<br>[Min, Max] | 0<br>[0, 0]         | 0<br>[0, 0]         | 0<br>[0, 5.67]       | 0<br>[0, 0]           | 0<br>[0, 0]            | 0<br>[0, 0]          | 0<br>[0, 5.67]       |
| dieldrin             |                     |                     |                      |                       |                        |                      |                      |
| Mean (SD)            | 2.99 (3.56)         | 3.19 (5.93)         | 1.59 (1.85)          | 1.69 (1.25)           | 3.48 (2.68)            | 1.87 (0.18)          | 2.58 (3.90)          |
| Median<br>[Min, Max] | 1.93<br>[0, 16.8]   | 1.81<br>[0, 37.8]   | 1.34<br>[0, 8.00]    | 1.33<br>[0, 4.50]     | 2.64<br>[0.50, 7.58]   | 1.87<br>[1.74, 2.00] | 1.74<br>[0, 37.8]    |
| endrin               |                     |                     |                      |                       |                        |                      |                      |
| Mean (SD)            | 0                   | 0                   | 0.41 (2.47)          | 0                     | 0                      | 0                    | 0.11 (1.26)          |
| Median<br>[Min, Max] | 0<br>[0, 0]         | 0<br>[0, 0]         | 0<br>[0, 15.0]       | 0<br>[0, 0]           | 0<br>[0, 0]            | 0<br>[0, 0]          | 0<br>[0, 15.0]       |
| chlordane            |                     |                     |                      |                       |                        |                      |                      |
| Mean (SD)            | 2.48 (2.84)         | 3.02 (4.01)         | 2.02 (2.59)          | 2.23 (2.01)           | 3.14 (2.29)            | 6.85 (3.04)          | 2.62 (3.09)          |
| Median<br>[Min, Max] | 1.60<br>[0, 13.2]   | 1.43<br>[0, 17.5]   | 1.27<br>[0, 11.3]    | 1.95<br>[0, 6.25]     | 3.39<br>[0, 8.02]      | 6.85<br>[4.70, 9.00] | 1.60<br>[0, 17.5]    |
| DDT                  |                     |                     |                      |                       |                        |                      |                      |
| Mean (SD)            | 632 (866)           | 587 (1180)          | 1170 (3730)          | 343 (691)             | 491 (784)              | 1450 (725)           | 729 (2080)           |
| Median<br>[Min, Max] | 313<br>[29.9, 4320] | 342<br>[44.0, 7640] | 292<br>[17.4, 22300] | 95.3<br>[30.5, 2540]  | 151<br>[79.3, 2760]    | 1450<br>[941, 1970]  | 260<br>[17.4, 22300] |
| heptachlor           |                     |                     |                      |                       |                        |                      |                      |
| Mean (SD)            | 0.91 (1.08)         | 1.56 (3.07)         | 0.93 (1.63)          | 0.73 (0.96)           | 1.73 (1.88)            | 0.58 (0.597)         | 1.16 (2.05)          |
| Median<br>[Min, Max] | 0.62<br>[0, 3.97]   | 0.56<br>[0, 14.7]   | 0.55<br>[0, 8.75]    | 0.54<br>[0, 3.44]     | 1.20<br>[0, 5.56]      | 0.58<br>[0.16, 1.00] | 0.57<br>[0, 14.7]    |
| mirex                |                     |                     |                      |                       |                        |                      |                      |
| Mean (SD)            | 0.99 (2.11)         | 0.09 (0.22)         | 0.25 (0.77)          | 0.15 (0.49)           | 0.14 (0.27)            | 1.48 (NA)            | 0.37 (1.17)          |
| Median<br>[Min, Max] | 0<br>[0, 9.80]      | 0<br>[0, 0.90]      | 0<br>[0, 3.40]       | 0<br>[0, 1.63]        | 0<br>[0, 0.69]         | 1.48<br>[1.48, 1.48] | 0<br>[0, 9.80]       |
| toxaphene            |                     |                     |                      |                       |                        |                      |                      |
| Mean (SD)            | 1.65 (3.53)         | 1.32 (2.87)         | 0.74 (1.32)          | 0.59 (1.04)           | 0.77 (0.96)            | 0.75 (1.06)          | 1.12 (2.46)          |
| Median<br>[Min, Max] | 0<br>[0, 15.9]      | 0<br>[0, 16.2]      | 0<br>[0, 4.06]       | 0<br>[0, 3.32]        | 0.31<br>[0, 2.39]      | 0.751<br>[0, 1.50]   | 0<br>[0, 16.2]       |
| α-HCH                |                     |                     |                      |                       |                        |                      |                      |
| Mean (SD)            | 0.38 (1.55)         | 0.46 (1.15)         | 0.17 (0.64)          | 0                     | 0.81 (2.80)            | 0.94 (0.08)          | 0.37 (1.36)          |
| Median<br>[Min, Max] | 0<br>[0, 8.60]      | 0<br>[0, 5.50]      | 0<br>[0, 3.59]       | 0<br>[0, 0]           | 0<br>[0, 10.5]         | 0.94<br>[0.89, 1.00] | 0<br>[0, 10.5]       |
| β-HCH                |                     |                     |                      |                       |                        |                      |                      |
| Mean (SD)            | 15.2 (27.1)         | 36.6 (78.4)         | 27.8 (82.4)          | 3.37 (4.69)           | 67.5 (224)             | 822 (733)            | 40.6 (147)           |
| Median<br>[Min, Max] | 6.39<br>[0, 153]    | 6.48<br>[0.53, 375] | 4.09<br>[0, 476]     | 2.20<br>[0, 17.1]     | 6.29<br>[0, 845]       | 822<br>[303, 1340]   | 5.47<br>[0, 1340]    |
| lindane              |                     |                     |                      |                       |                        |                      |                      |
| Mean (SD)            | 0.60 (1.44)         | 1.91 (3.31)         | 0.96 (2.43)          | 1.27 (2.50)           | 0.34 (0.83)            | 0.75 (1.06)          | 1.12 (2.47)          |
| Median<br>[Min, Max] | 0<br>[0, 7.11]      | 0.97<br>[0, 16.0]   | 0<br>[0, 13.0]       | 0<br>[0, 8.00]        | 0<br>[0, 2.99]         | 0.75<br>[0, 1.50]    | 0<br>[0, 16.0]       |
| chlordecone          |                     |                     |                      |                       |                        |                      |                      |
| Mean (SD)            | 0                   | 0                   | 0                    | 0                     | 0                      |                      | 0                    |
| Median<br>[Min, Max] | 0<br>[0, 0]         | 0<br>[0, 0]         | 0<br>[0, 0]          | 0<br>[0, 0]           | 0<br>[0, 0]            |                      | 0<br>[0, 0]          |



Supporting information

| endosulfan       |              |               |              |              |              |              |              |
|------------------|--------------|---------------|--------------|--------------|--------------|--------------|--------------|
| Mean (SD)        | 0.05 (0.26)  | 0.45 (1.15)   | 0.17 (0.64)  | 0            | 0.81 (2.80)  | 0.94 (0.08)  | 0.28 (1.14)  |
| Median           | 0            | 0             | 0            | 0            | 0            | 0.94         | 0            |
| [Min, Max]       | [0, 1.50]    | [0, 5.50]     | [0, 3.59]    | [0, 0]       | [0, 10.5]    | [0.89, 1.00] | [0, 10.5]    |
| PCB <sub>6</sub> |              |               |              |              |              |              |              |
| Mean (SD)        | 32.5 (37.7)  | 39.3 (48.0)   | 87.7 (135)   | 104 (202)    | 61.6 (78.8)  | 31.6 (13.8)  | 59.8 (106)   |
| Median           | 18.2         | 25.6          | 30.3         | 25.0         | 22.4         | 31.6         | 23.4         |
| [Min, Max]       | [2.55, 146]  | [3.00, 264]   | [0.90, 630]  | [2.46, 765]  | [4.75, 253]  | [21.9, 41.4] | [0.90, 765]  |
| HCB              |              |               |              |              |              |              |              |
| Mean (SD)        | 7.53 (9.17)  | 10.6 (16.0)   | 18.5 (28.7)  | 7.15 (7.78)  | 6.03 (3.98)  | 25.7 (1.68)  | 11.4 (18.3)  |
| Median           | 4.33         | 6.14          | 6.61         | 4.08         | 4.81         | 25.7         | 5.33         |
| [Min, Max]       | [1.14, 43.3] | [1.26, 73.3]  | [1.38, 154]  | [1.67, 31.9] | [0.97, 15.0] | [24.5, 26.9] | [0.97, 154]  |
| PeCBz            |              |               |              |              |              |              |              |
| Mean (SD)        | 0.07 (0.229) | 0.0882 (0.25) | 0.06 (0.199) | 0            | 0.07 (0.246) | 0.66 (NA)    | 0.07 (0.22)  |
| Median           | 0            | 0             | 0            | 0            | 0            | 0.66         | 0            |
| [Min, Max]       | [0, 0.90]    | [0, 1.16]     | [0, 0.70]    | [0, 0]       | [0, 0.85]    | [0.66, 0.66] | [0, 1.16]    |
| HCBd             |              |               |              |              |              |              |              |
| Mean (SD)        | 0            | 0             | 0            | 0            | 0            |              | 0            |
| Median           | 0            | 0             | 0            | 0            | 0            |              | 0            |
| [Min, Max]       | [0, 0]       | [0, 0]        | [0, 0]       | [0, 0]       | [0, 0]       |              | [0, 0]       |
| SCCP             |              |               |              |              |              |              |              |
| Mean (SD)        | 72.5 (46.8)  | 57.6 (40.6)   | 56.8 (52.5)  | 43.9 (28.8)  | 70.4 (31.1)  |              | 59.2 (42.0)  |
| Median           | 69.0         | 44.0          | 39.8         | 45.8         | 66.0         | ]            | 48.3         |
| [Min, Max]       | [17.1, 164]  | [20.0, 175]   | [12.9, 188]  | [10.0, 89.0] | [38.3, 111]  |              | [10.0, 188]  |
| PBDE             |              |               |              |              |              |              |              |
| Mean (SD)        | 0.377 (0.52) | 1.01 (4.09)   | 0.305 (0.63) | 1.41 (2.95)  | 0.757 (1.57) | 0.27 (NA)    | 0.69 (2.50)  |
| Median           | 0.18         | 0.12          | 0.11         | 0.29         | 0.27         | 0.27         | 0.16         |
| [Min, Max]       | [0.03, 2.45] | [0, 24.7]     | [0, 3.20]    | [0.05, 11.0] | [0.05, 6.10] | [0.27, 0.27] | [0, 24.7]    |
| PBDE209          |              |               |              |              |              |              |              |
| Mean (SD)        | 0.74 (0.86)  | 0.61 (0.99)   | 0.22 (0.15)  | 0.99 (2.01)  | 0.69 (0.667) |              | 0.62 (1.11)  |
| Median           | 0.29         | 0.17          | 0.17         | 0.19         | 0.69         |              | 0.21         |
| [Min, Max]       | [0, 2.40]    | [0.10, 3.31]  | [0.09, 0.57] | [0.11, 5.92] | [0.22, 1.16] |              | [0, 5.92]    |
| PBB153           |              |               |              |              |              |              |              |
| Mean (SD)        | 0.06 (0.31)  | 0.14 (0.45)   | 0            | 0            | 0            | 0 (NA)       | 0.06 (0.29)  |
| Median           | 0            | 0             | 0            | 0            | 0            | 0            | 0            |
| [Min, Max]       | [0, 1.50]    | [0, 1.68]     | [0, 0]       | [0, 0]       | [0, 0]       | [0, 0]       | [0, 1.68]    |
| HBCD             |              |               |              |              |              |              |              |
| Mean (SD)        | 0.97 (1.60)  | 1.30 (2.89)   | 1.23 (1.86)  | 0.46 (0.372) | 0.68 (0.53)  |              | 1.05 (1.97)  |
| Median           | 0.46         | 0.36          | 0.59         | 0.49         | 0.55         |              | 0.50         |
| [Min, Max]       | [0, 5.50]    | [0, 15.0]     | [0, 8.00]    | [0, 1.30]    | [0.17, 2.00] |              | [0, 15.0]    |
| TEQ_PCDD         |              |               |              |              |              |              |              |
| Mean (SD)        | 4.18 (3.86)  | 4.17 (3.42)   | 3.65 (3.23)  | 7.51 (8.59)  | 6.39 (8.16)  | 4.44 (0.62)  | 4.60 (4.97)  |
| Median           | 2.67         | 2.86          | 2.65         | 2.58         | 2.66         | 4.44         | 2.75         |
| [Min, Max]       | [0.94, 16.9] | [1.19, 14.7]  | [0.57, 17.4] | [0.87, 26.4] | [0.89, 33.2] | [4.00, 4.87] | [0.57, 33.2] |
| TEQ_PCDF         |              |               |              |              |              |              |              |
| Mean (SD)        | 1.85 (1.52)  | 1.83 (1.71)   | 2.25 (1.74)  | 3.19 (3.95)  | 2.68 (2.73)  | 2.25 (0.18)  | 2.18 (2.14)  |
| Median           | 1.12         | 1.34          | 1.71         | 1.29         | 1.53         | 2.25         | 1.38         |
| [Min, Max]       | [0.33, 6.95] | [0.42, 9.48]  | [0.41, 7.63] | [0.37, 13.5] | [0.37, 8.95] | [2.13, 2.38] | [0.33, 13.5] |
| TEQ_PCB          |              |               |              |              |              |              |              |
| Mean (SD)        | 2.48 (2.40)  | 3.03 (2.93)   | 3.64 (3.15)  | 2.43 (1.96)  | 2.73 (2.21)  | 3.14 (0.152) | 2.98 (2.72)  |
| Median           | 1.71         | 2.47          | 2.25         | 1.87         | 2.16         | 3.14         | 2.00         |
| [Min, Max]       | [0.46, 12.9] | [0.47, 16.2]  | [0, 12.9]    | [0.35, 8.37] | [0.55, 7.71] | [3.04, 3.25] | [0, 16.2]    |
| PFOS             |              |               |              |              |              |              |              |
| Mean (SD)        | 22.6 (17.5)  | 20.5 (17.1)   | 33.1 (45.0)  | 21.4 (15.3)  | 23.9 (11.9)  |              | 24.4 (26.0)  |
| Median           | 19.0         | 16.7          | 21.0         | 17.1         | 22.0         |              | 18.9         |
| [Min, Max]       | [0, 65.3]    | [0, 83.3]     | [0, 212]     | [0, 51.4]    | [12.0, 43.0] |              | [0, 212]     |
| PFOA             |              |               |              |              |              |              |              |
| Mean (SD)        | 19.8 (12.3)  | 21.3 (9.13)   | 26.3 (14.4)  | 17.9 (7.42)  | 25.1 (14.0)  |              | 22.1 (11.7)  |
| Median           | 16.1         | 17.6          | 24.6         | 17.1         | 19.8         |              | 18.6         |
| [Min, Max]       | [7.81, 61.5] | [8.68, 37.4]  | [6.20, 63.4] | [8.37, 35.3] | [12.8, 57.8] |              | [6.20, 63.4] |
| PFHxS            |              |               |              |              |              |              |              |
| Mean (SD)        | 0.378 (1.69) | 1.50 (4.20)   | 7.01 (24.7)  | 1.43 (3.08)  | 6.36 (12.0)  |              | 2.96 (12.8)  |
| Median           | 0            | 0             | 0            | 0            | 0            |              | 0            |
| [Min, Max]       | [0, 7.56]    | [0, 17.4]     | [0, 111]     | [0, 8.49]    | [0, 34.8]    |              | [0, 111]     |

## 2.1 Correlations

### 2.1.1 By year

OCPs: Kruskal-Wallis chi-squared = 62.4, df = 17, p-value =  $4.2 \times 10^{-7}$ . The differences between years were significant but there were not enough 'x' observations to make pairwise assessment.

indPOPs: Kruskal-Wallis chi-squared = 99.6, df = 20, p-value =  $1.5 \times 10^{-12}$ . The differences between years were significant and a pairwise assessment gave 36 pairs having significant differences. These occurred mainly in the years 2001 and 2002 (N=11 and N=8, resp.) but not in 1987 when only PCB<sub>6</sub> were measured.

dl-POPs: Kruskal-Wallis chi-squared = 261, df = 20, p-value <  $2.2 \times 10^{-16}$ . The differences between years were significant and a pairwise assessment gave 93 pairs having significant differences. Details showed that the pairwise differences especially the early years were significantly different from other years; and with increasing years, the number of significantly different p-values decreased. For example: for 1987, all p-values were <0.05 (N=20), for 1992, there were 17 p-values <0.05, 14 for 2001, and 8 for 2002. For the more recent years, there were only few significant differences among them.

BFRs: Kruskal-Wallis chi-squared = 26.256, df = 17, p-value = 0.070. The differences between years were not significant.

PFAS: Kruskal-Wallis chi-squared = 25.67, df = 10, p-value = 0.004. The differences between years were significant but there were not enough 'x' observations to make pairwise assessment.

### 2.1.2 By income

OCPs: Kruskal-Wallis chi-squared = 12.337, df = 3, p-value = 0.006. Results were significantly different. Pairwise assessment showed that all pools belonging to the high-income group (H) were significantly different from L (p=0.032), LM (p=0.032), and UM (p=0.010).

indPOPs: Kruskal-Wallis chi-squared = 16.8, df = 3, p-value = 0.0008 Results were significantly different. Pairwise assessment showed that all pools belonging to the high-income group (H) were significantly different from L (p=0.005), LM (p=0.005), and UM (p=0.008).

dl-POPs: Kruskal-Wallis chi-squared = 67.123, df = 3, p-value =  $1.8 \times 10^{-14}$ . Results were significantly different. Pairwise assessment showed that all pools belonging to the high-income group (H) were significantly different from L (p= $2.9 \times 10^{-10}$ ), LM (p= $8.0 \times 10^{-7}$ ), and UM (p= $9.0 \times 10^{-10}$ ). In addition, the low-income group pools were significantly different from the LM group (p=0.0035).

BFRs: Kruskal-Wallis chi-squared = 7.104, df = 3, p-value = 0.069. Results were not significantly different.

PFAS: Kruskal-Wallis chi-squared = 4.8558, df = 3, p-value = 0.18. Results were not significantly different.

### 2.1.3 By population density

Significance tests on population density only showed a statistically significant difference for the OCP measurements (p=0.021). For the pairwise assessment, only the Hongkong samples (PD>2000) were significantly different from PD\_90-200 and PD\_200-330 (p=0.046 for both). For the other POPs groups the p-values were very high, between p=0.42 and p=0.85.

### 3 Correlations for POP with time, GNI, and population density

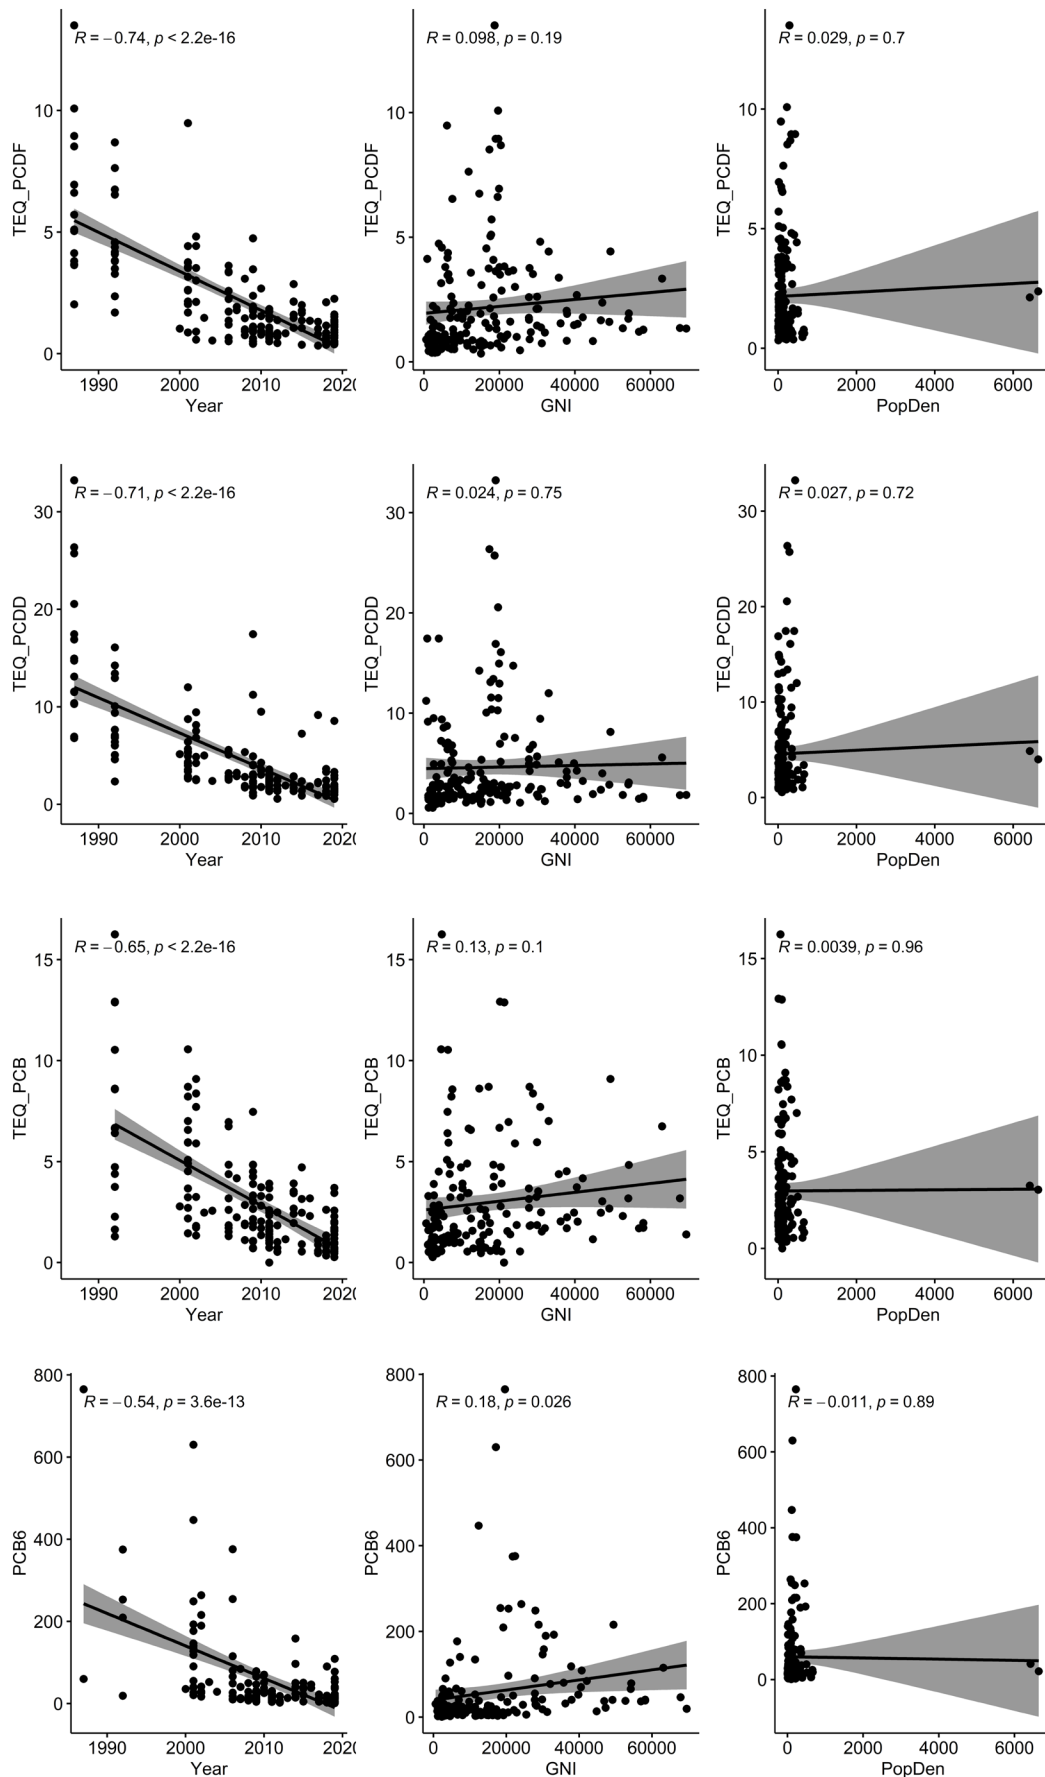

Supporting information

Figure S 3: Moderate negative but significant correlation between POP and time confirming downward trends towards recent years; amounts for PCDD, PCDF, dl-PCB are pg TEQ/g fat, for PCB<sub>6</sub> in ng/g fat.

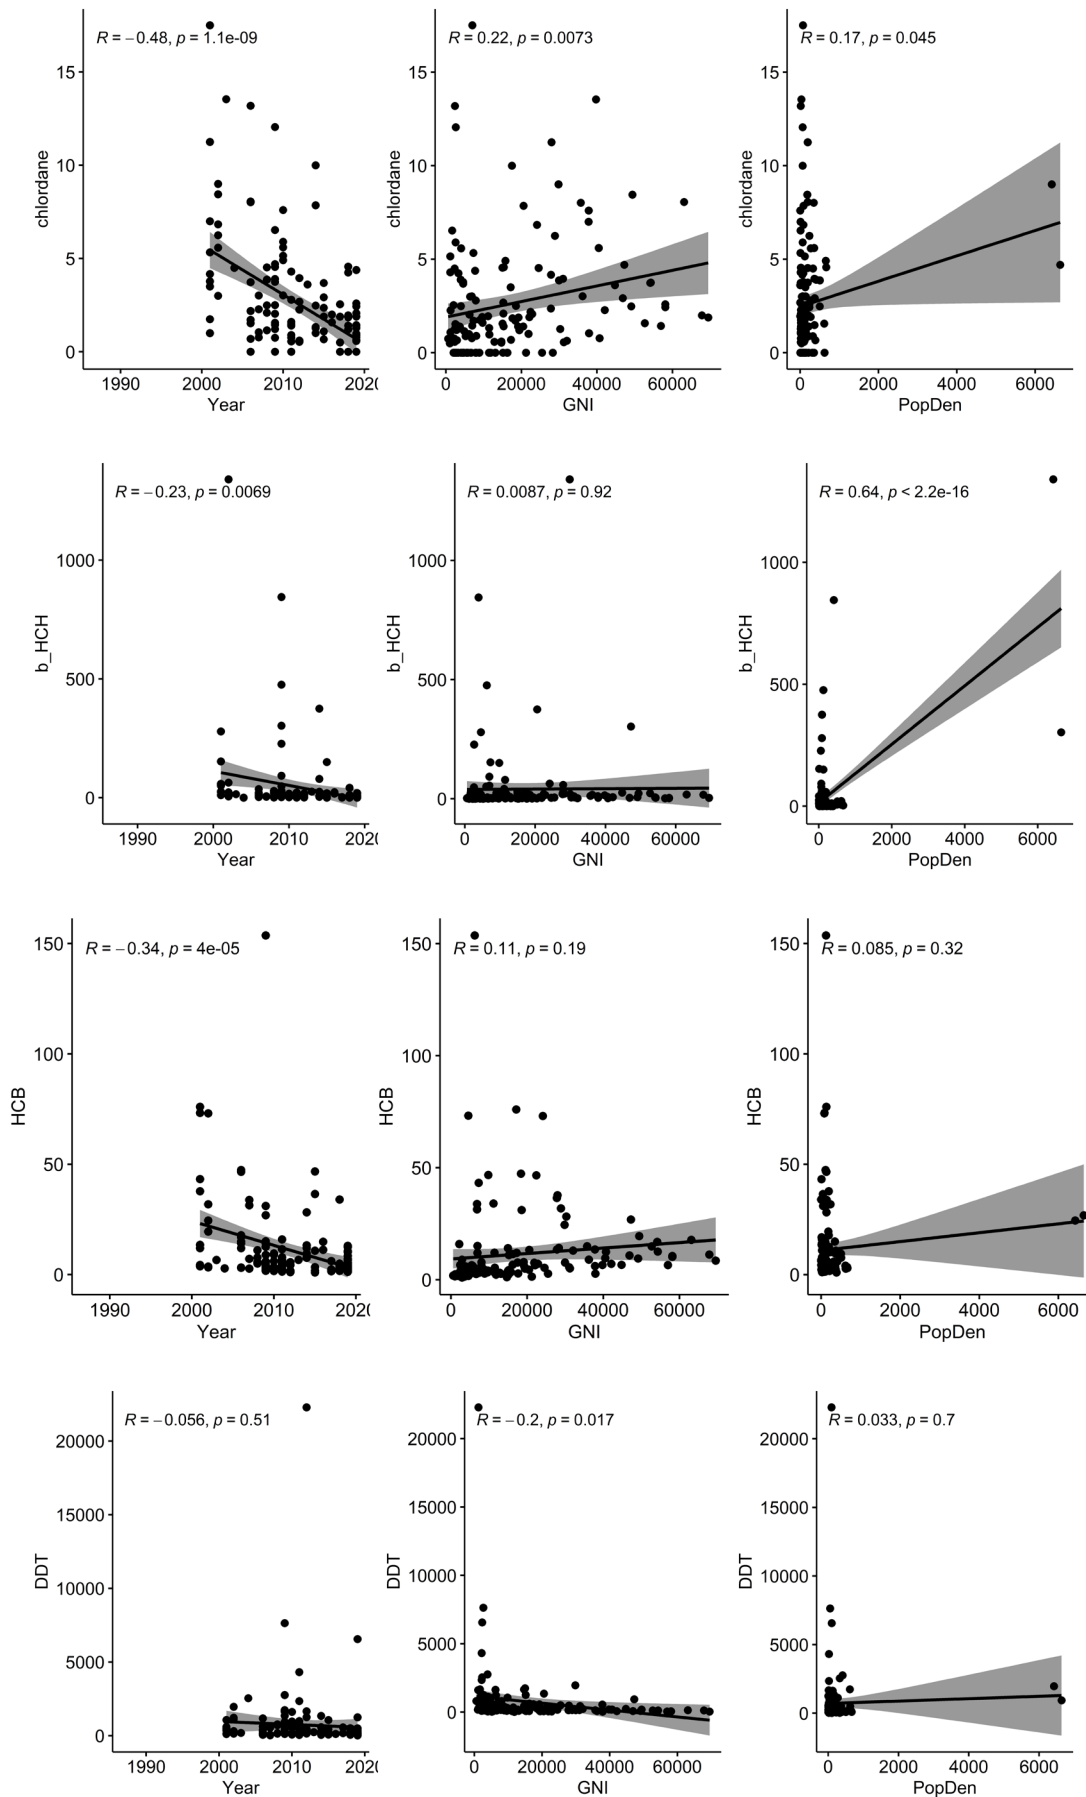

Supporting information

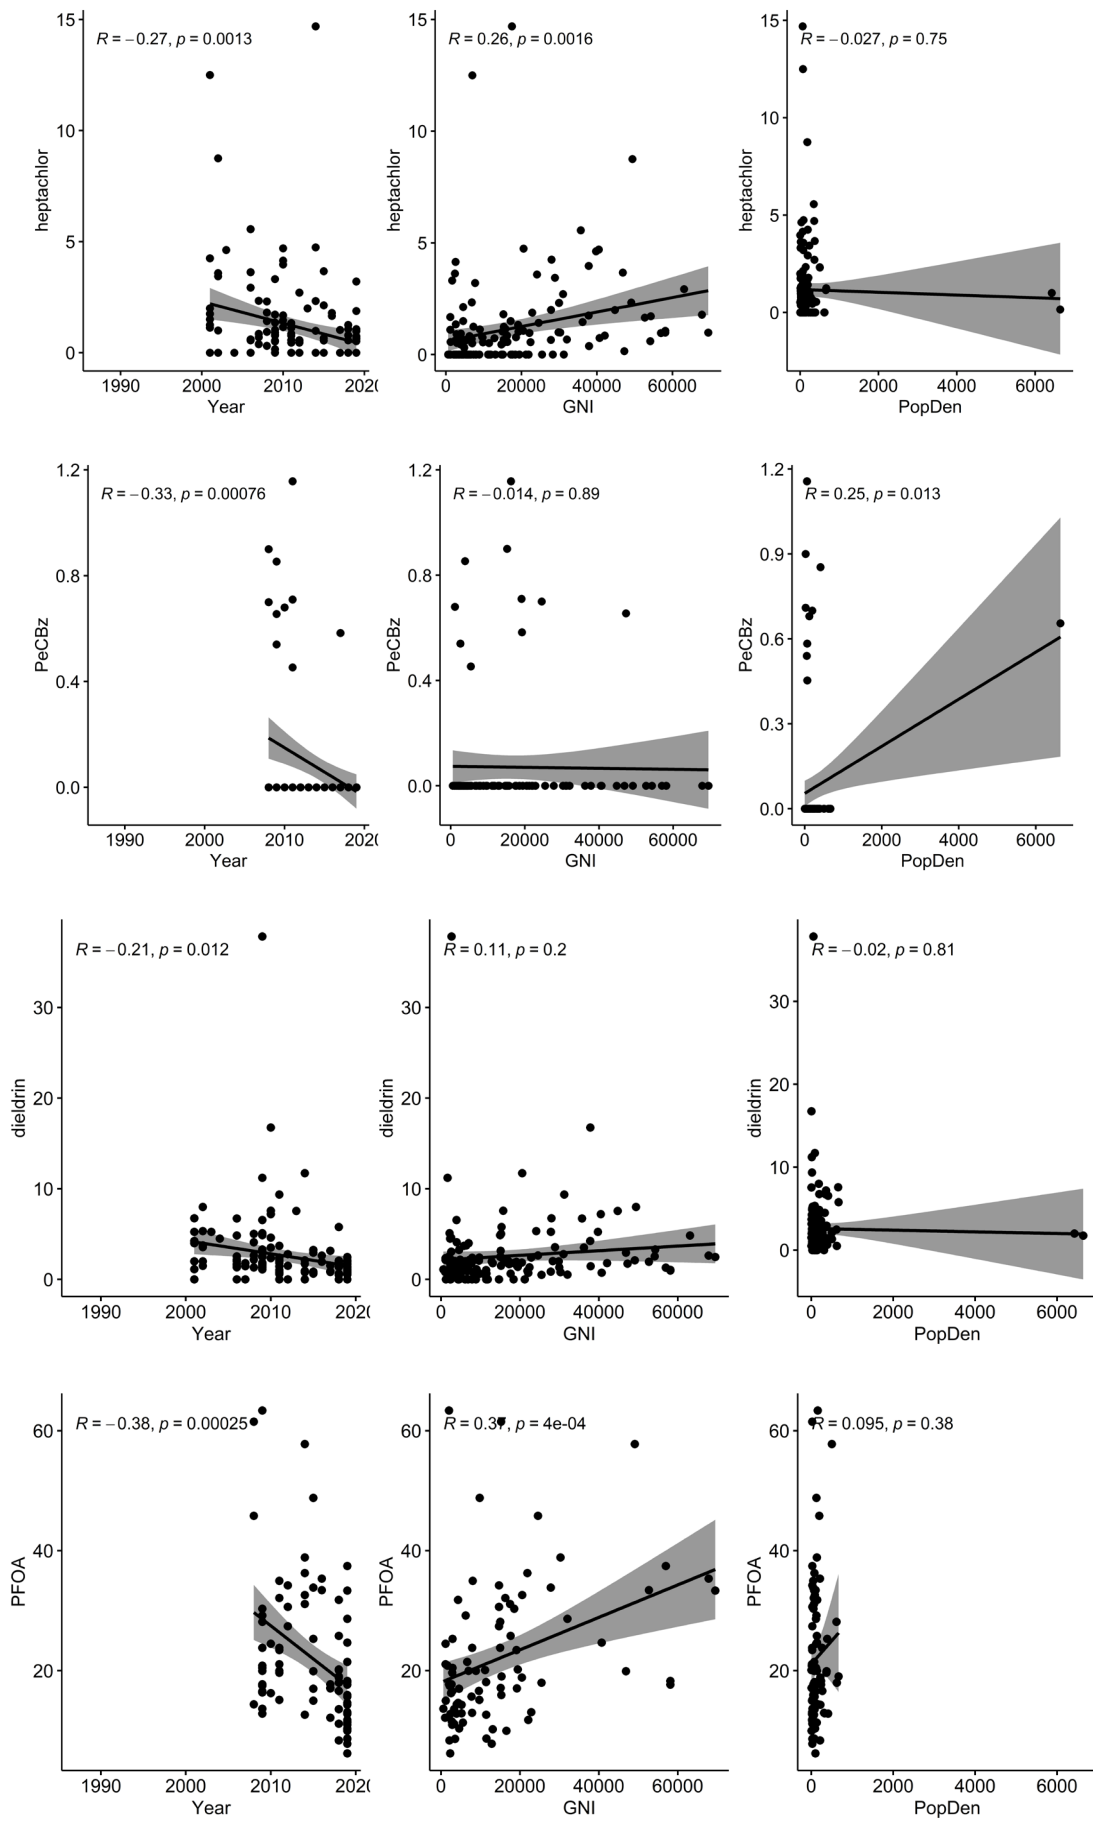

Supporting information

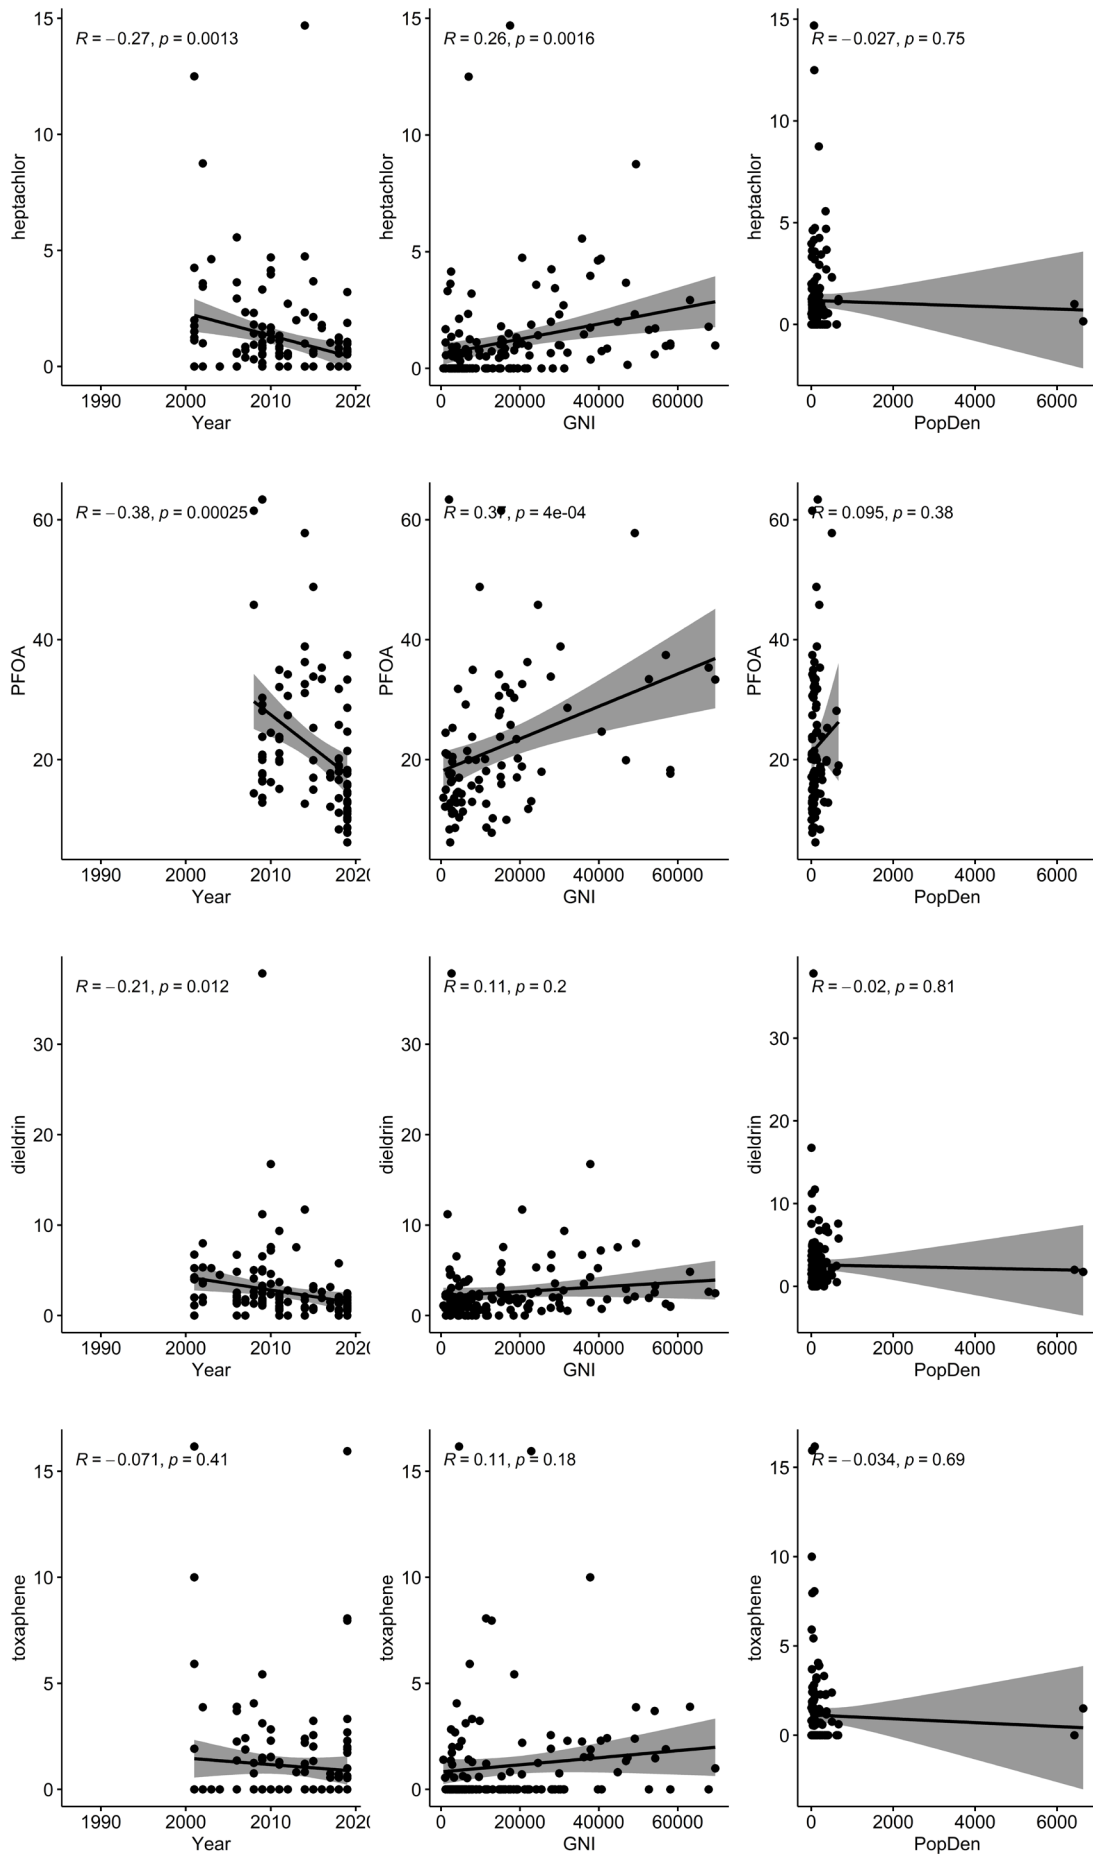

Supporting information

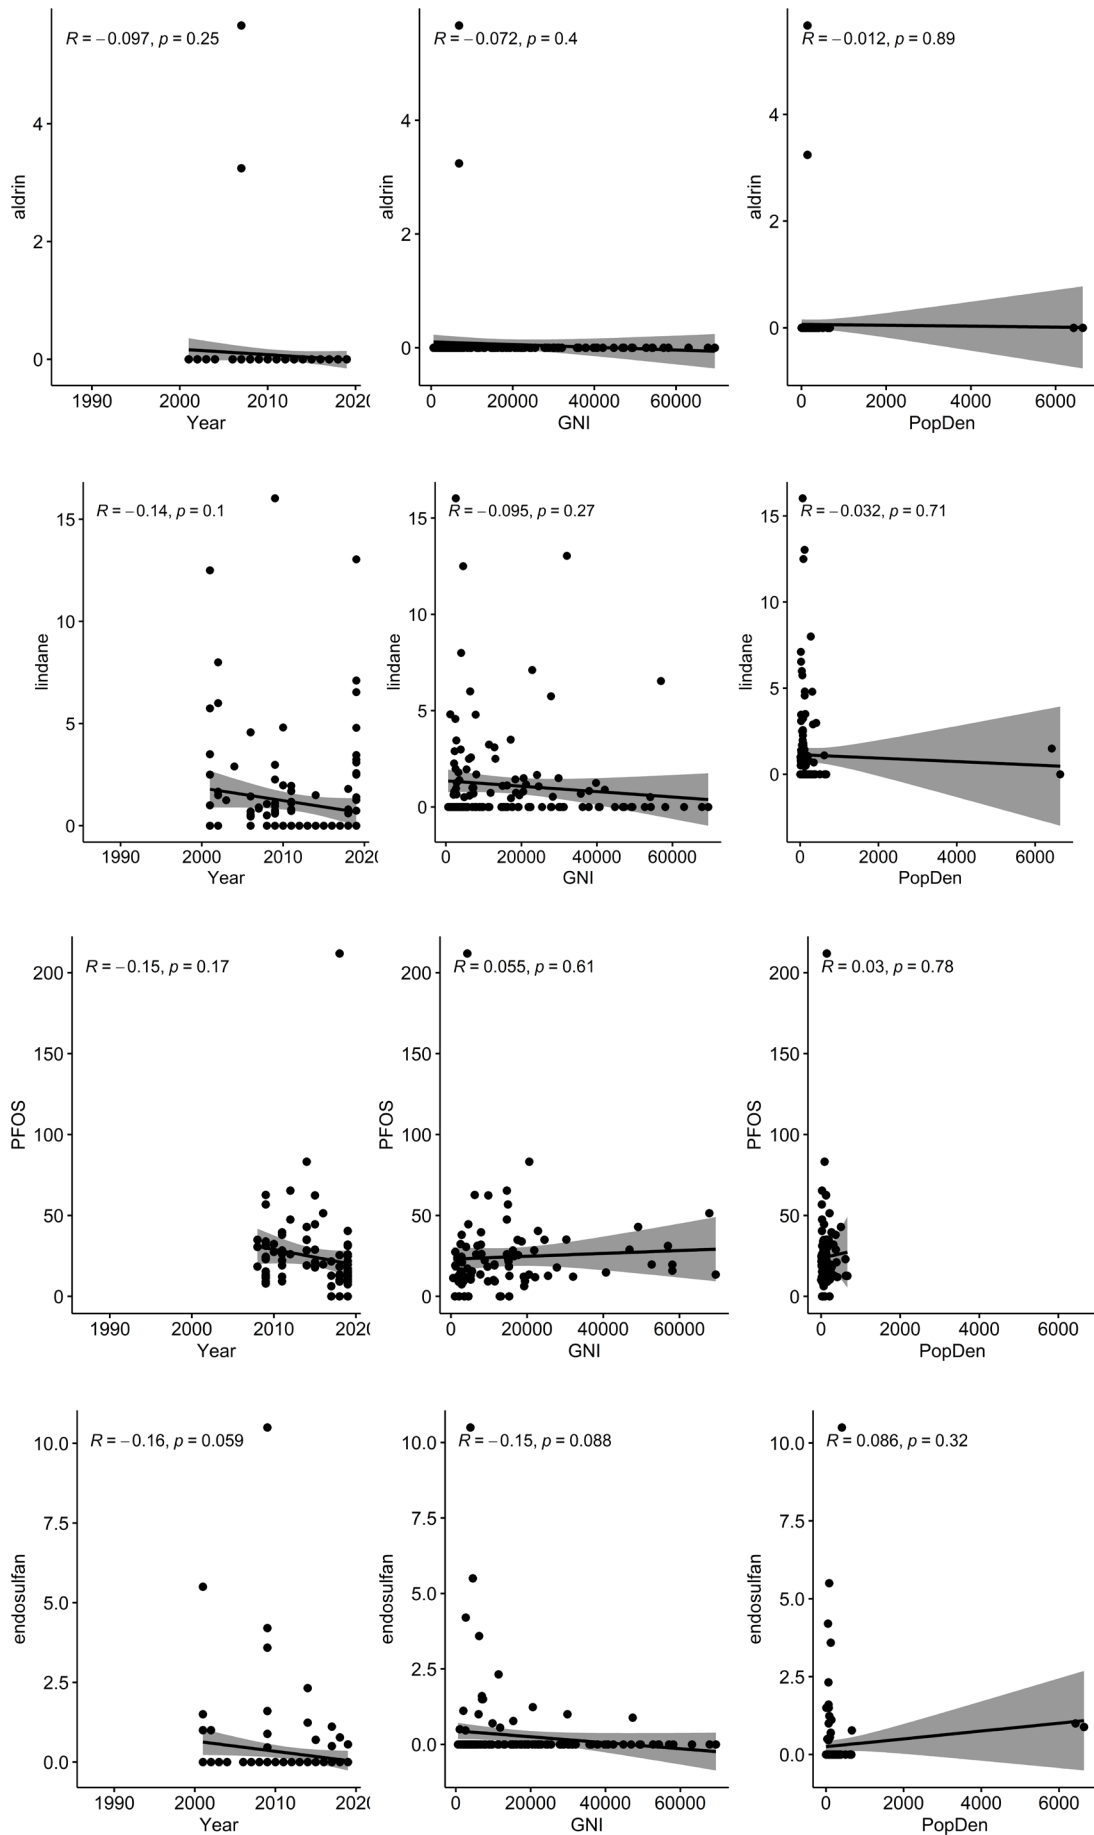

Supporting information

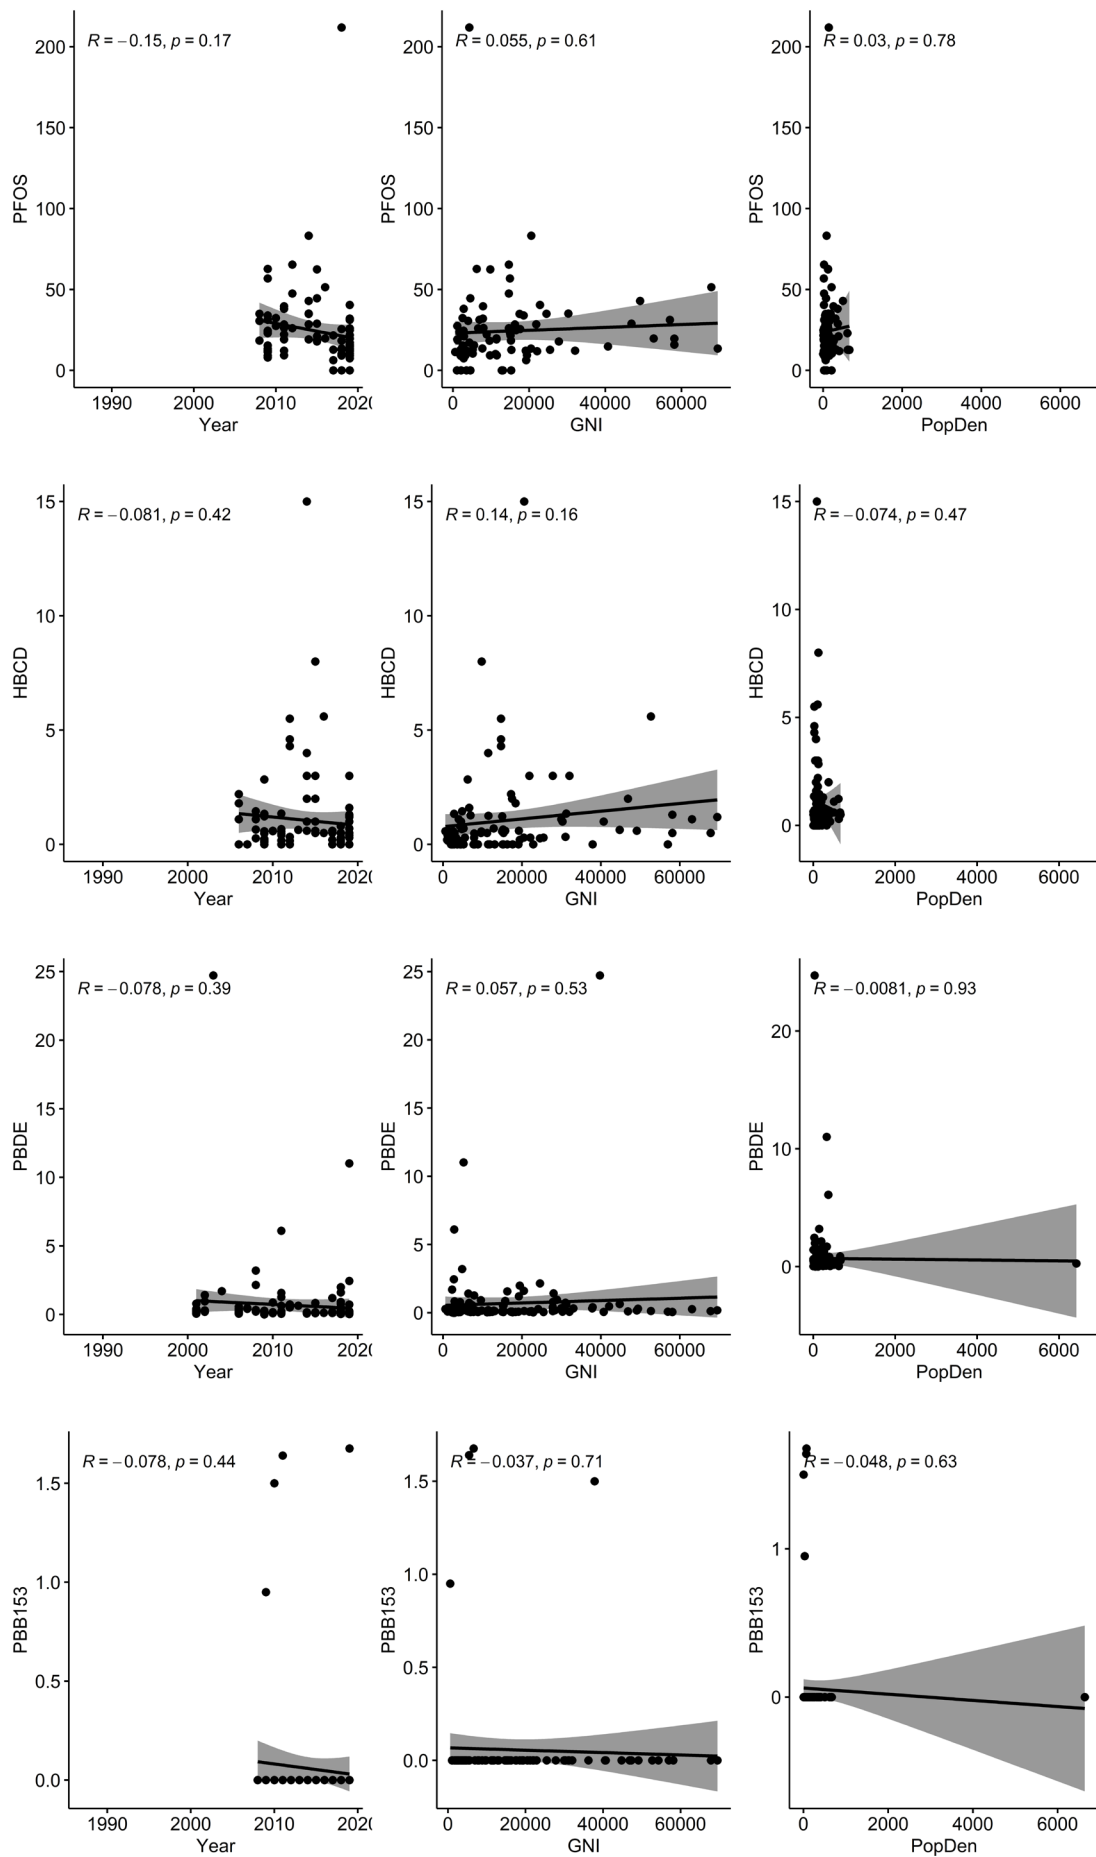



Supporting information

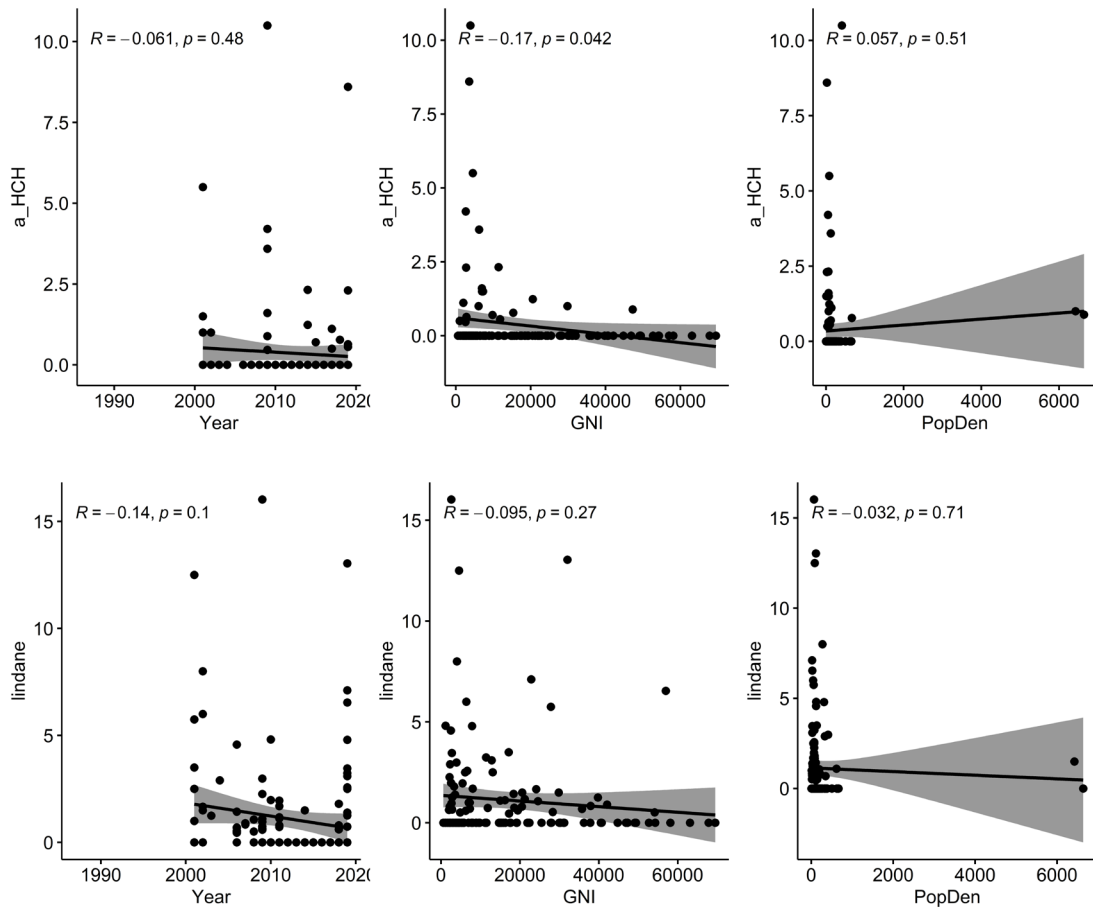

Figure S 4: No or weak negative correlation between POP and time confirming downward trends. POPs in the upper have p-values <0.05; amounts for in ng/g fat; PFOS and PFOA in pg/g f.w.

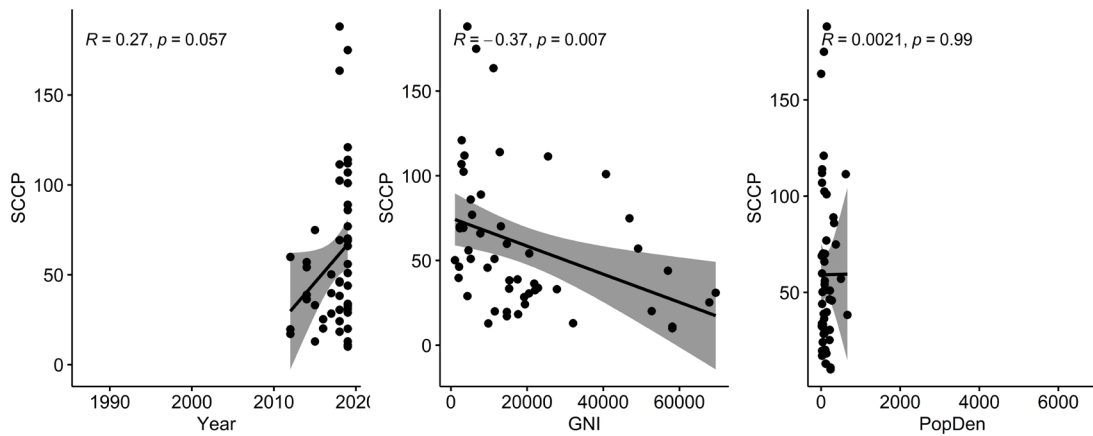

## Supporting information

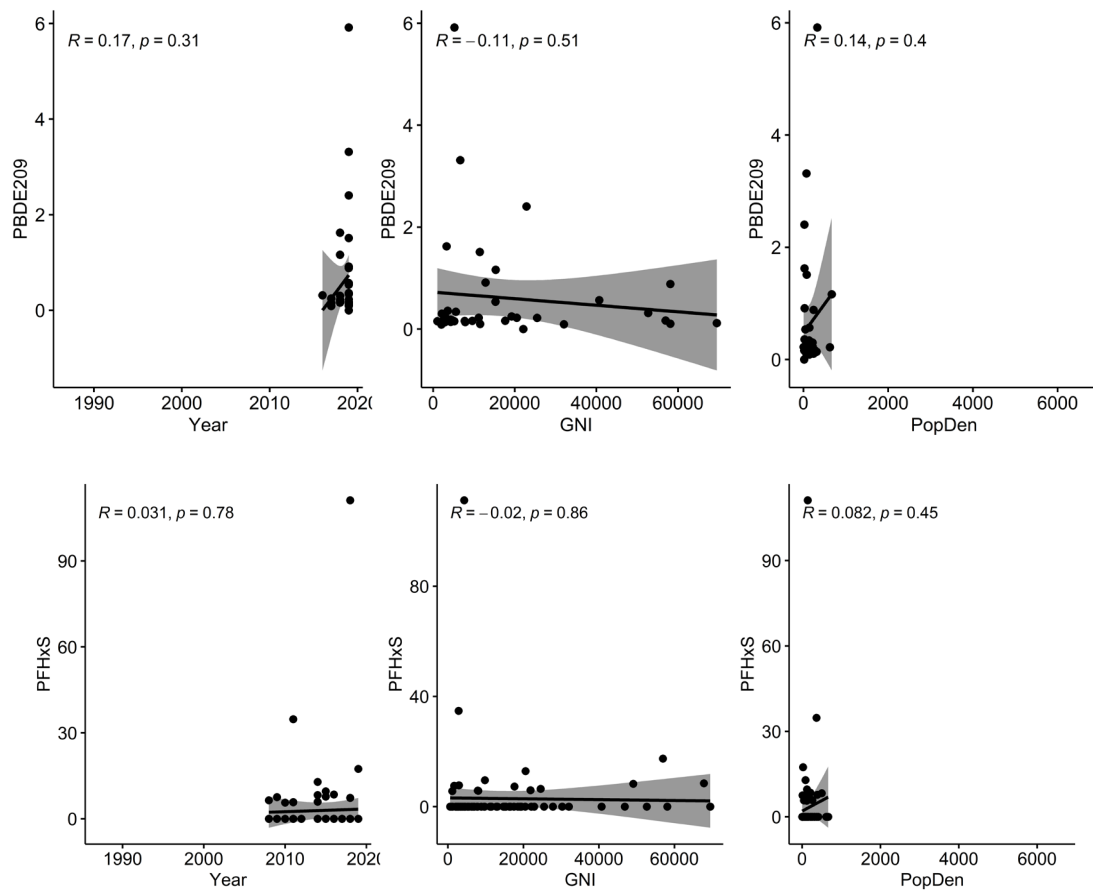

Figure S 5: very weak positive correlation between POP and time confirming upward trends towards recent year; none of these correlations is significant. Amounts for in ng/g fat; PFHxS in pg/g f.w.
